# Supplementary material
Source: PubMed Central journal article supplement (PMC5349325)
Supplement: NIHMS853815-supplement-supplement.pdf [file NIHMS853815-supplement-supplement.pdf]

## Supplementary Online Content

Sheehan WJ, Permaul P, Petty CR, et al. Association between allergen exposure in urban schools and asthma morbidity among inner-city students. *JAMA Pediatr.* Published online November 21, 2016. doi:10.1001/jamapediatrics.2016.2543

**eFigure 1.** SICAS Schema: Typical Year of the Study

**eFigure 2.** Flowchart of Participants in the Study

**eTable.** Maximum Asthma Symptom Days (Unadjusted) by Mouse Allergen Exposure

This supplementary material has been provided by the authors to give readers additional information about their work.

**eFigure 1.** SICAS Schema: Typical Year of the Study

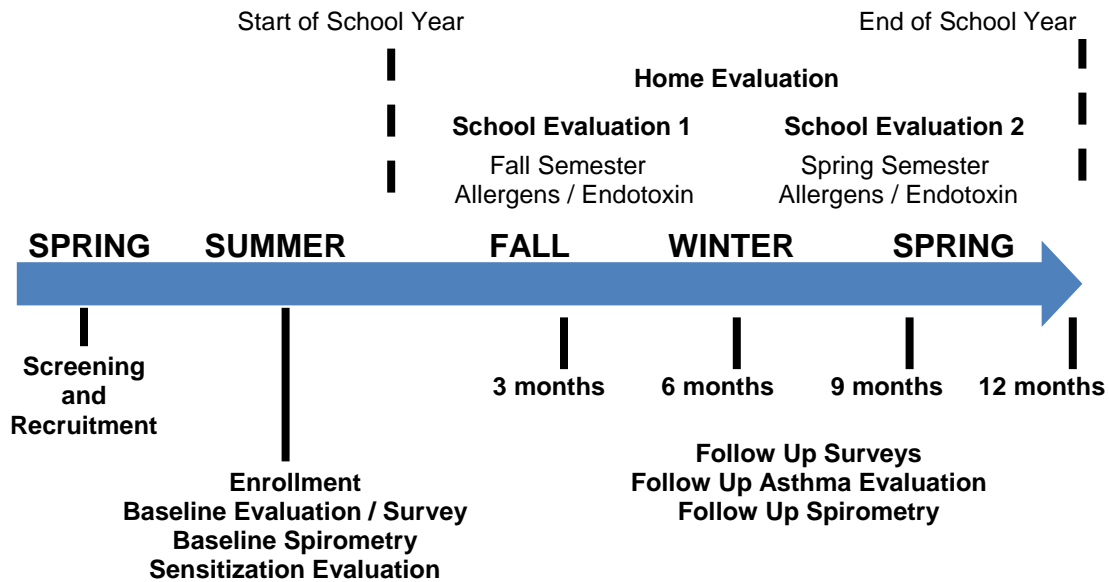

- Screening and recruitment in the spring prior to school year
- Enrollment and baseline evaluation during the summer prior to school year
- Environmental evaluation and asthma monitoring during the school year
- Each year: approximately 7-10 new schools (approximately 70 students)
- Cycle repeats annually
- At the end of the 5 year study: 351 students from 38 schools enrolled

**eFigure 2.** Flowchart of Participants in the Study

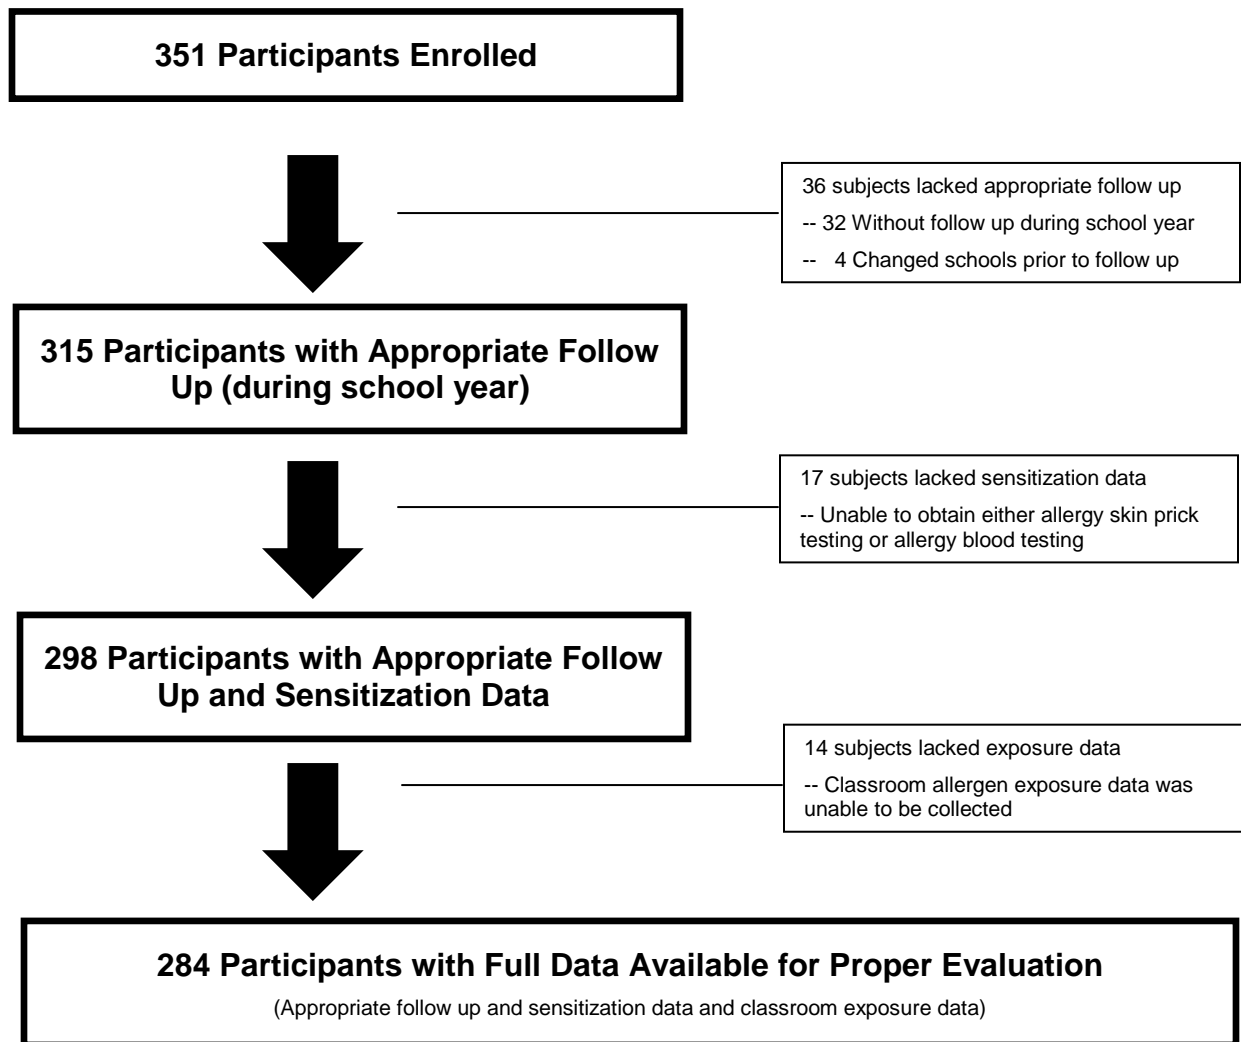

**eTable. Maximum Asthma Symptom Days (Unadjusted) by Mouse Allergen Exposure**

| <b>Mouse Allergen in Settled Dust</b>                |                              |                               |                               |                               |                               |
|------------------------------------------------------|------------------------------|-------------------------------|-------------------------------|-------------------------------|-------------------------------|
|                                                      | <b>Quintile 1</b>            | <b>Quintile 2</b>             | <b>Quintile 3</b>             | <b>Quintile 4</b>             | <b>Quintile 5</b>             |
|                                                      | <b>LLOD –<br/>0.157 µg/g</b> | <b>0.166 -<br/>0.443 µg/g</b> | <b>0.454 -<br/>1.572 µg/g</b> | <b>1.594 -<br/>4.639 µg/g</b> | <b>4.700 -<br/>144.2 µg/g</b> |
| <b>Observations<br/>(Follow up<br/>Evaluations)</b>  | 143                          | 147                           | 140                           | 142                           | 143                           |
| <b>Maximum<br/>Symptom<br/>Days</b>                  |                              |                               |                               |                               |                               |
| 0-1 Days                                             | 73 (51%)                     | 69 (50%)                      | 68 (49%)                      | 55 (39%)                      | 64 (45%)                      |
| 2-3 Days                                             | 29 (20%)                     | 42 (29%)                      | 33 (24%)                      | 40 (28%)                      | 35 (24%)                      |
| 4-9 Days                                             | 27 (19%)                     | 21 (14%)                      | 24 (17%)                      | 36 (25%)                      | 23 (16%)                      |
| 10-14 Days                                           | 14 (10%)                     | 15 (10%)                      | 15 (11%)                      | 11 (8%)                       | 21 (15%)                      |
| <b>Total<br/>Symptom<br/>Days</b>                    | 417                          | 429                           | 440                           | 459                           | 517                           |
| <b>Mean<br/>Symptom<br/>Days</b>                     | 2.92                         | 2.92                          | 3.14                          | 3.23                          | 3.62                          |
| <b>Median<br/>Symptom<br/>Days</b>                   | 1                            | 2                             | 2                             | 2                             | 2                             |
| <b>Percent<br/>Likelihood of<br/>Symptom<br/>Day</b> | 20.8%                        | 20.8%                         | 22.4%                         | 23.1%                         | 25.8%                         |
| <b>Crude Odds<br/>Ratio<br/>(vs. Quintile<br/>1)</b> | --                           | 1.00                          | 1.10                          | 1.14                          | 1.32                          |
